# Supplementary material
Source: publisher figshare collection journal article supplement (https://asha.figshare.com/ndownloader/files/31294162)
Supplement: Supplementary file 1 [file 31294162]

## Supplemental Material S1. Questionnaire.

### Screeners

1. Are you a certified speech-language pathologist in the United States?
2. Have you worked as a school-based speech-language pathologist in at least one of the following states in the past 5 years: Arkansas, Louisiana, Oklahoma, and/or Texas?

### Questionnaire

|                                                                                                                                                             |                                                                                                                                                                                                                                                                                                                                                                  |
|-------------------------------------------------------------------------------------------------------------------------------------------------------------|------------------------------------------------------------------------------------------------------------------------------------------------------------------------------------------------------------------------------------------------------------------------------------------------------------------------------------------------------------------|
| How many total years have you worked as a school-based speech-language pathologist?                                                                         | 0-5 years; 6-10 years; 11-15 years; Over 15 years                                                                                                                                                                                                                                                                                                                |
| With which race and/or ethnicity do you identify?<br><i>Select all that apply.</i>                                                                          | White; Black; Hispanic/Latino; American Indian/Alaska Native; Asian/Pacific Islander; Two or More Races; Other please specify: _____                                                                                                                                                                                                                             |
| Do you speak a language other than English fluently?                                                                                                        | Yes or No (If yes, which language(s) do you speak?)                                                                                                                                                                                                                                                                                                              |
| Are you able to independently provide comprehensive diagnostic and treatment services in a language other than English?                                     | Yes or No (If yes, in what language(s)?)                                                                                                                                                                                                                                                                                                                         |
| In what setting have you learned about how to work with culturally and linguistically diverse children and their families?<br><i>Select all that apply.</i> | In my graduate program; In continuing education outside of my place of employment; In a training organized by an employer; Through mentorship from other speech-language pathologists; On the job; I have not learned how to best work with culturally and linguistically diverse children and their families; Other please specify: _____                       |
| What best describes you, given your family history?                                                                                                         | <b>1st Generation:</b> I was born in a country other than the U.S.; <b>2nd Generation:</b> I was born in the U.S.; either parent was born in a country other than the U.S.; <b>3rd Generation:</b> I was born in the U.S., both parents were born in the U.S., and all grandparents were born in another country; <b>4th Generation:</b> I was born in the U.S., |

|                                                                                                                    |                                                                                                                                                                                                                                                                                       |
|--------------------------------------------------------------------------------------------------------------------|---------------------------------------------------------------------------------------------------------------------------------------------------------------------------------------------------------------------------------------------------------------------------------------|
|                                                                                                                    | both parents born in U.S., and at least one grandparent born in another country; <b>5<sup>th</sup> Generation:</b> I was born in the U.S.; both parents and all grandparents also born in U.S.; I don't know what generation best fits since I lack some information; Other (fill in) |
| How many speech-language assessments of bilingual or multilingual children have you conducted in the past 5 years? | <b>*None, 1-5, 6-10, 11-15, 16-20, Over 20</b>                                                                                                                                                                                                                                        |

**\*[Responses of over 5 routed to PriorityQ/PracticeQ combo]**

**\*[Responses of under or equal to 5 routed to PriorityQ only]**

**PriorityQ. When conducting speech-language assessments with bilingual or multilingual children, how important is it to...**

**Please indicate according to the following format:**

**1 = Essential; 2 = High Priority; 3 = Medium Priority; 4 = Low Priority; 5 = Not a Priority**

**PracticeQ. Consider your speech-language assessments over the past five years. To what extent did you do the following when assessing bilingual or multilingual children?**

**Please indicate according to the following format:**

**1 = Always; 2 = Usually; 3 = Regularly; 4 = Occasionally; 5 = Never**

- 1) Take steps to stay up to date on research and evidence related to assessing multilingual children.  
*For example, reviewing professional literature on multilingualism/second language acquisition or receiving training on best practices for conducting multilingual assessment*
- 2) Evaluate your own culture, values and biases, and how they impact your practice.
- 3) Ensure respectful interactions with multilingual children and their families. *For example, supporting family culture and values, supporting use of native language, involving families in decision-making*

- 4) Use formal assessment scores normed on monolingual children for the child being assessed.
- 5) Assess speech and language skills in every language the child speaks.
- 6) Use dynamic assessment in which the child is given explicit instruction on a particular skill and assessed for his or her ability to learn.
- 7) Collaborate with an interpreter during assessments and counseling involving a language you do not speak.
- 8) Collaborate with another professional or community member to learn about the child's language, culture or speech norms and patterns. *For example, a family member, professional colleague or other cultural informant*
- 9) Seek out information to learn about the child's language, culture or speech norms and patterns. *For example, reading research articles, doing online research, attending cultural events*

| Demographic Questions                                                                                  |                                                                   |
|--------------------------------------------------------------------------------------------------------|-------------------------------------------------------------------|
| Question                                                                                               | Responses                                                         |
| What is your age?                                                                                      | 20-29; 30-39; 40-49; 50-59; 60+                                   |
| In which of the following states have you worked in the past 5 years?<br><i>Select all that apply.</i> | Arkansas, Louisiana, Oklahoma, Texas                              |
| In which setting do you primarily practice?<br><i>Select all that apply.</i>                           | Rural, Suburban, Urban, Other                                     |
| With which age group do you primarily work?<br><i>Select all that apply.</i>                           | Early Intervention; Elementary School; Middle School; High School |
| What is the average number of children on your monthly caseload?                                       | <15, 15-25, 26-50, >50                                            |
